# Supplementary material for: Genome-wide identification and expression analysis of serine hydroxymethyltransferase (SHMT) gene family in tomato (Solanum lycopersicum)
Source: PeerJ. 2022 Feb 10;10:e12943. doi: 10.7717/peerj.12943 (PMC8841039; doi:10.7717/peerj.12943)
Supplement: Supplemental Information 4 [file peerj-10-12943-s004.xlsx]

## Sheet: Sheet1
	Supplementary file 4: Cis-acting elements of SlSHMTs in promoter region.
	Type	Element	Description	Gene
				SlSHMT1	SlSHMT2	SlSHMT3	SlSHMT4	SlSHMT5	SlSHMT6	SlSHMT7
	Common cis-acting element	CAAT-box	common cis-acting element in promoter and enhancer regions	29	13	18	18	17	14	14
		TATA-box	core promoter element around -30 of transcription start	62	84	91	43	19	50	81
	Light responsive element	circadian	cis-acting regulatory element involved in circadian control	1	1			1		1
		G-box	cis-acting regulatory element involved in light responsiveness		1	3	5	2		5
	Hormone responsive element	CGTCA-motif	cis-acting regulatory element involved in the MeJA-responsiveness	1		2	2	3	1	1
		P-box	gibberellin-responsive element	1	1
		TCA-element	cis-acting element involved in salicylic acid responsiveness	1	4			2	1	1
		TGACG-motif	cis-acting regulatory element involved in the MeJA-responsiveness	1		2	2	3	1	1
		TGA-element	auxin-responsive element	1	1		3
		ABRE	cis-acting element involved in the abscisic acid responsiveness			2	4	1		4
	Stress responsive element	LTR	cis-acting element involved in low-temperature responsiveness	1	1
		ARE	cis-acting regulatory element essential for the anaerobic induction		1	1	1	1	1
		MBS	MYB binding site involved in drought-inducibility		1		1	2		1
		TC-rich repeats	cis-acting element involved in defense and stress responsiveness			1				1
	Other elements	3-AF1 binding site	light responsive element					1		1
		AACA_motif	involved in endosperm-specific negative expression						1
		A-box	cis-acting regulatory element					5
		ACE	cis-acting element involved in light responsiveness			1				1
		AE-box	part of a module for light response		1	1
		ATCT-motif	part of a conserved DNA module involved in light responsiveness					1
		AT-rich element	binding site of AT-rich DNA binding protein (ATBP-1)	1
		AT-rich sequence	element for maximal elicitor-mediated activation (2copies)			2
		AuxRR-core	cis-acting regulatory element involved in auxin responsiveness					1
		Box 4	part of a conserved DNA module involved in light responsiveness	3	6	3	6	1	4	4
		Box II	part of a light responsive element				1
		Box III	protein binding site						1
		CAG-motif	part of a light response element		1
		CAT-box	cis-acting regulatory element related to meristem expression	1	1			1		1
		chs-CMA1a	part of a light responsive element			1
		GA-motif	part of a light responsive element	1
		Gap-box	part of a light responsive element	1
		GATA-motif	part of a light responsive element	1	3		1	1	2	2
		GCN4_motif	cis-regulatory element involved in endosperm expression				1
		GT1-motif	light responsive element		2	2	2	3	1	4
		HD-Zip 1	element involved in differentiation of the palisade mesophyll cells					1
		HD-Zip 3	protein binding site			1		1
		I-box	part of a light responsive element	1	1
		MRE	MYB binding site involved in light responsiveness		2					1
		O2-site	cis-acting regulatory element involved in zein metabolism regulation				1		1	1
		Sp1	light responsive element	1	1
		TATC-box	cis-acting element involved in gibberellin-responsiveness	1				1
		TCCC-motif	part of a light responsive element		1	1
		TCT-motif	part of a light responsive element	2				1		1
		TGA-box	part of an auxin-responsive element				1
		Unnamed__1	60K protein binding site		1
		WUN-motif	wound-responsive element					1	1
