# Supplementary material for: Genome-wide identification and expression analysis of serine hydroxymethyltransferase (SHMT) gene family in tomato (Solanum lycopersicum)
Source: PeerJ. 2022 Feb 10;10:e12943. doi: 10.7717/peerj.12943 (PMC8841039; doi:10.7717/peerj.12943)
Supplement: Supplemental Information 5 [file peerj-10-12943-s005.xlsx]

## Sheet: tissue expression
supplementary file 5. qRT-PCR data.
	SHMT1	growth period	plant tissue	Ct(Gene)	Ct(Actin)	Ct(Actin) average	△Ct	△Ct average	△△Ct	Relative expression	Average expression		SHMT2	growth period	plant tissue	Ct(Gene)	Ct(Actin)	Ct(Actin) average	△Ct	△Ct average	△△Ct	Relative expression	Average expression
		Vegetative growth period	root	22.48	18.13	17.9333	4.54667	5.23	-0.683333	1.60585				Vegetative growth period	root	27.51	18.13	17.9333	9.57667	5.23	4.34667	0.0491499
				22.95	17.89		5.01667	5.23	-0.213333	1.15936	1.32182					27.26	17.89		9.32667	5.23	4.09667	0.0584495	0.0546859
				22.9	17.78		4.96667	5.23	-0.263333	1.20025						27.31	17.78		9.37667	5.23	4.14667	0.0564585
			stem	23.18	16.43	16.38	6.8	5.23	1.57	0.336808					stem	20.09	16.43	16.38	3.71	5.23	-1.52	2.86791
			幼苗茎	22.82	16.32		6.44	5.23	1.21	0.432269	0.381796				幼苗茎	19.8	16.32		3.42	5.23	-1.81	3.50642	3.12134
			幼苗茎	23.02	16.39		6.64	5.23	1.41	0.376312					幼苗茎	20.03	16.39		3.65	5.23	-1.58	2.9897
			leaf	23.66	16.66	16.7533	6.90667	5.23	1.67667	0.312805					leaf	16.8	16.66	16.7533	0.0466667	5.23	-5.18333	36.3361
			幼苗叶	23.84	16.81		7.08667	5.23	1.85667	0.276114	0.330126				幼苗叶	16.9	16.81		0.146667	5.23	-5.08333	33.9028	34.8717
			幼苗叶	23.3	16.79		6.54667	5.23	1.31667	0.401461					幼苗叶	16.88	16.79		0.126667	5.23	-5.10333	34.3761
		Reproductive growth period	root	25.32	18.49	18.46	6.86	5.23	1.63	0.323088				Reproductive growth period	root	28.08	18.49	18.46	9.62	5.23	4.39	0.0476956
			花期根	25.37	18.37		6.91	5.23	1.68	0.312083	0.31014				花期根	27.86	18.37		9.4	5.23	4.17	0.0555527	0.0539895
			花期根	25.45	18.52		6.99	5.23	1.76	0.295248					花期根	27.78	18.52		9.32	5.23	4.09	0.0587202
			stem	23.45	17.33	17.3433	6.10667	5.23	0.876667	0.544624					stem	20.69	17.33	17.3433	3.34667	5.23	-1.88333	3.68926
			花期茎	23.05	17.59		5.70667	5.23	0.476667	0.718636	0.676052				花期茎	20.56	17.59		3.21667	5.23	-2.01333	4.03714	3.8398
			花期茎	22.96	17.11		5.61667	5.23	0.386667	0.764895					花期茎	20.65	17.11		3.30667	5.23	-1.92333	3.79298
			leaf	23.81	18.64	18.6567	5.15333	5.23	-0.0766667	1.05458					leaf	17.28	18.64	18.6567	-1.37667	5.23	-6.60667	97.4552
			花期叶	23.98	18.63		5.32333	5.23	0.0933333	0.937354	0.982994				花期叶	17.49	18.63		-1.16667	5.23	-6.39667	84.2536	89.2442
			花期叶	23.95	18.7		5.29333	5.23	0.0633333	0.95705					花期叶	17.46	18.7		-1.19667	5.23	-6.42667	86.024
			flower	22.86	18.24	18.3067	4.55333	5.23	-0.676667	1.59844					flower	19.02	18.24	18.3067	0.713333	5.23	-4.51667	22.8903
			花期花	22.69	18.24		4.38333	5.23	-0.846667	1.79834	1.81136				花期花	19.12	18.24		0.813333	5.23	-4.41667	21.3574	21.5312
			花期花	22.51	18.44		4.20333	5.23	-1.02667	2.03731					花期花	19.19	18.44		0.883333	5.23	-4.34667	20.3459
			green fruit	25.33	17.26	17.2267	8.10333	5.23	2.87333	0.136471					green fruit	21.63	17.26	17.2267	4.40333	5.23	-0.826667	1.77358
			绿果	25.35	17.1		8.12333	5.23	2.89333	0.134592	0.14118				绿果	21.51	17.1		4.28333	5.23	-0.946667	1.92741	1.83728
			绿果	25.17	17.32		7.94333	5.23	2.71333	0.152477					绿果	21.6	17.32		4.37333	5.23	-0.856667	1.81085
			red fruit	26.66	18.23	18.1167	8.54333	5.23	3.31333	0.100598					red fruit	27.61	18.23	18.1167	9.49333	5.23	4.26333	0.0520725
			红果	26.44	18.04		8.32333	5.23	3.09333	0.117169	0.108778				红果	27.8	18.04		9.68333	5.23	4.45333	0.0456471	0.0470683
			红果	26.55	18.08		8.43333	5.23	3.20333	0.108568					红果	27.87	18.08		9.75333	5.23	4.52333	0.0434852
	SHMT3	growth period	plant tissue	Ct(Gene)	Ct(Actin)	Ct(Actin) average	△Ct	△Ct average	△△Ct	Relative expression	Average expression		SHMT4	growth period	plant tissue	Ct(Gene)	Ct(Actin)	Ct(Actin) average	△Ct	△Ct average	△△Ct	Relative expression	Average expression
		Vegetative growth period	root	22.48	18.13	17.9333	4.54667	5.23	-0.683333	1.60585				Vegetative growth period	root	19.9	18.13	17.9333	1.96667	5.23	-3.26333	9.60199
				22.1	17.89		4.16667	5.23	-1.06333	2.08975	1.66066					20.06	17.89		2.12667	5.23	-3.10333	8.59402	8.29739
				22.8	17.78		4.86667	5.23	-0.363333	1.28639						20.42	17.78		2.48667	5.23	-2.74333	6.69616
			stem	20.74	16.43	16.38	4.36	5.23	-0.87	1.82766					stem	18.03	16.43	16.38	1.65	5.23	-3.58	11.9588
			幼苗茎	20.51	16.32		4.13	5.23	-1.1	2.14355	1.95883				幼苗茎	17.94	16.32		1.56	5.23	-3.67	12.7286	11.188
			幼苗茎	20.68	16.39		4.3	5.23	-0.93	1.90528					幼苗茎	18.46	16.39		2.08	5.23	-3.15	8.87656
			leaf	21.64	16.66	16.7533	4.88667	5.23	-0.343333	1.26868					leaf	18.61	16.66	16.7533	1.85667	5.23	-3.37333	10.3627
			幼苗叶	21.67	16.81		4.91667	5.23	-0.313333	1.24258	1.26887				幼苗叶	18.3	16.81		1.54667	5.23	-3.68333	12.8468	10.5617
			幼苗叶	21.61	16.79		4.85667	5.23	-0.373333	1.29534					幼苗叶	18.9	16.79		2.14667	5.23	-3.08333	8.4757
		Reproductive growth period	root	24.1	18.49	18.46	5.64	5.23	0.41	0.752623				Reproductive growth period	root	21.43	18.49	18.46	2.97	5.23	-2.26	4.78991
			花期根	24.11	18.37		5.65	5.23	0.42	0.747425	0.788195				花期根	21.88	18.37		3.42	5.23	-1.81	3.50642	4.27596
			花期根	23.9	18.52		5.44	5.23	0.21	0.864537					花期根	21.51	18.52		3.05	5.23	-2.18	4.53154
			stem	21.59	17.33	17.3433	4.24667	5.23	-0.983333	1.97703					stem	18.47	17.33	17.3433	1.12667	5.23	-4.10333	17.188
			花期茎	21.62	17.59		4.27667	5.23	-0.953333	1.93634	1.89429				花期茎	18.45	17.59		1.10667	5.23	-4.12333	17.428	17.8958
			花期茎	21.75	17.11		4.40667	5.23	-0.823333	1.76949					花期茎	18.32	17.11		0.976667	5.23	-4.25333	19.0713
			leaf	24.45	18.64	18.6567	5.79333	5.23	0.563333	0.676737					leaf	20.94	18.64	18.6567	2.28333	5.23	-2.94667	7.70966
			花期叶	24.44	18.63		5.78333	5.23	0.553333	0.681444	0.669117				花期叶	21.2	18.63		2.54333	5.23	-2.68667	6.43824	6.86205
			花期叶	24.51	18.7		5.85333	5.23	0.623333	0.649169					花期叶	21.2	18.7		2.54333	5.23	-2.68667	6.43824
			flower	21.86	18.24	18.3067	3.55333	5.23	-1.67667	3.19688					flower	20.79	18.24	18.3067	2.48333	5.23	-2.74667	6.71165
			花期花	21.96	18.24		3.65333	5.23	-1.57667	2.9828	3.04729				花期花	20.68	18.24		2.37333	5.23	-2.85667	7.2434	7.00012
			花期花	21.97	18.44		3.66333	5.23	-1.56667	2.9622					花期花	20.72	18.44		2.41333	5.23	-2.81667	7.04533
			green fruit	23.03	17.26	17.2267	5.80333	5.23	0.573333	0.672062					green fruit	20.49	17.26	17.2267	3.26333	5.23	-1.96667	3.90864
			绿果	23.15	17.1		5.92333	5.23	0.693333	0.618423	0.615947				绿果	20.17	17.1		2.94333	5.23	-2.28667	4.87927	4.06353
			绿果	23.3	17.32		6.07333	5.23	0.843333	0.557354					绿果	20.69	17.32		3.46333	5.23	-1.76667	3.40267
			red fruit	23.6	18.23	18.1167	5.48333	5.23	0.253333	0.838956					red fruit	22.25	18.23	18.1167	4.13333	5.23	-1.09667	2.1386
			红果	23.64	18.04		5.52333	5.23	0.293333	0.816014	0.805446				红果	22.56	18.04		4.44333	5.23	-0.786667	1.72508	2.27529
			红果	23.74	18.08		5.62333	5.23	0.393333	0.761368					红果	21.78	18.08		3.66333	5.23	-1.56667	2.9622
	SHMT5	growth period	plant tissue	Ct(Gene)	Ct(Actin)	Ct(Actin) average	△Ct	△Ct average	△△Ct	Relative expression	Average expression		SHMT6	growth period	plant tissue	Ct(Gene)	Ct(Actin)	Ct(Actin) average	△Ct	△Ct average	△△Ct	Relative expression	Average expression
		Vegetative growth period	root	23.99	18.13	17.9333	6.05667	5.23	0.826667	0.56383				Vegetative growth period	root	23.48	18.13	17.9333	5.54667	5.23	0.316667	0.802923
				23.6	17.89		5.66667	5.23	0.436667	0.73884	0.645671					23.22	17.89		5.28667	5.23	0.0566667	0.961483	0.859512
				23.82	17.78		5.88667	5.23	0.656667	0.634342						23.46	17.78		5.52667	5.23	0.296667	0.814131
			stem	23.46	16.43	16.38	7.08	5.23	1.85	0.277392					stem	22.17	16.43	16.38	5.79	5.23	0.56	0.678302
			幼苗茎	23.19	16.32		6.81	5.23	1.58	0.334482	0.307986				幼苗茎	22.03	16.32		5.65	5.23	0.42	0.747425	0.674822
			幼苗茎	23.29	16.39		6.91	5.23	1.68	0.312083					幼苗茎	22.35	16.39		5.97	5.23	0.74	0.598739
			leaf	21.71	16.66	16.7533	4.95667	5.23	-0.273333	1.2086					leaf	23.04	16.66	16.7533	6.28667	5.23	1.05667	0.480742
			幼苗叶	21.63	16.81		4.87667	5.23	-0.353333	1.27751	1.20459				幼苗叶	22.62	16.81		5.86667	5.23	0.636667	0.643197	0.651726
			幼苗叶	21.81	16.79		5.05667	5.23	-0.173333	1.12766					幼苗叶	22.25	16.79		5.49667	5.23	0.266667	0.831238
		Reproductive growth period	root	24.35	18.49	18.46	5.89	5.23	0.66	0.632878				Reproductive growth period	root	24.07	18.49	18.46	5.61	5.23	0.38	0.768438
			花期根	24.35	18.37		5.89	5.23	0.66	0.632878	0.628537				花期根	24.27	18.37		5.81	5.23	0.58	0.668964	0.724845
			花期根	24.38	18.52		5.92	5.23	0.69	0.619854					花期根	24.13	18.52		5.67	5.23	0.44	0.737135
			stem	23.95	17.33	17.3433	6.60667	5.23	1.37667	0.385108					stem	23.57	17.33	17.3433	6.22667	5.23	0.996667	0.501157
			花期茎	23.95	17.59		6.60667	5.23	1.37667	0.385108	0.374862				花期茎	23.75	17.59		6.40667	5.23	1.17667	0.442372	0.482724
			花期茎	24.07	17.11		6.72667	5.23	1.49667	0.354371					花期茎	23.56	17.11		6.21667	5.23	0.986667	0.504642
			leaf	24.42	18.64	18.6567	5.76333	5.23	0.533333	0.690956					leaf	24.47	18.64	18.6567	5.81333	5.23	0.583333	0.66742
			花期叶	24.41	18.63		5.75333	5.23	0.523333	0.695762	0.702339				花期叶	24.59	18.63		5.93333	5.23	0.703333	0.614152	0.64358
			花期叶	24.36	18.7		5.70333	5.23	0.473333	0.720298					花期叶	24.51	18.7		5.85333	5.23	0.623333	0.649169
			flower	23.12	18.24	18.3067	4.81333	5.23	-0.416667	1.33484					flower	22.12	18.24	18.3067	3.81333	5.23	-1.41667	2.66968
			花期花	23.12	18.24		4.81333	5.23	-0.416667	1.33484	1.28538				花期花	22.01	18.24		3.70333	5.23	-1.52667	2.88119	2.68637
			花期花	23.29	18.44		4.98333	5.23	-0.246667	1.18646					花期花	22.21	18.44		3.90333	5.23	-1.32667	2.50822
			green fruit	24.87	17.26	17.2267	7.64333	5.23	2.41333	0.187722					green fruit	23.75	17.26	17.2267	6.52333	5.23	1.29333	0.408007
			绿果	24.3	17.1		7.07333	5.23	1.84333	0.278677	0.23467				绿果	23.94	17.1		6.71333	5.23	1.48333	0.357661	0.363418
			绿果	24.53	17.32		7.30333	5.23	2.07333	0.23761					绿果	24.08	17.32		6.85333	5.23	1.62333	0.324585
			red fruit	24.63	18.23	18.1167	6.51333	5.23	1.28333	0.410845					red fruit	25.9	18.23	18.1167	7.78333	5.23	2.55333	0.170361
			红果	24.47	18.04		6.35333	5.23	1.12333	0.459032	0.479648				红果	25.86	18.04		7.74333	5.23	2.51333	0.17515	0.176457
			红果	24.16	18.08		6.04333	5.23	0.813333	0.569066					红果	25.79	18.08		7.67333	5.23	2.44333	0.183858
	SHMT7	growth period	plant tissue	Ct(Gene)	Ct(Actin)	Ct(Actin) average	△Ct	△Ct average	△△Ct	Relative expression	Average expression
		Vegetative growth period	root	23.01	18.13	17.9333	5.07667	5.23	-0.153333	1.11214
				22.83	17.89		4.89667	5.23	-0.333333	1.25992	1.20202
				22.86	17.78		4.92667	5.23	-0.303333	1.23399
			stem	22.46	16.43	16.38	6.08	5.23	0.85	0.554785
			幼苗茎	22.5	16.32		6.12	5.23	0.89	0.539614	0.522476
			幼苗茎	22.69	16.39		6.31	5.23	1.08	0.473029
			leaf	23.07	16.66	16.7533	6.31667	5.23	1.08667	0.470848
			幼苗叶	23.43	16.81		6.67667	5.23	1.44667	0.366868	0.416821
			幼苗叶	23.26	16.79		6.50667	5.23	1.27667	0.412748
		Reproductive growth period	root	24.12	18.49	18.46	5.66	5.23	0.43	0.742262
			花期根	24.37	18.37		5.91	5.23	0.68	0.624165	0.653677
			花期根	24.44	18.52		5.98	5.23	0.75	0.594604
			stem	21.75	17.33	17.3433	4.40667	5.23	-0.823333	1.76949
			花期茎	22.06	17.59		4.71667	5.23	-0.513333	1.42734	1.63141
			花期茎	21.81	17.11		4.46667	5.23	-0.763333	1.69741
			leaf	25.82	18.64	18.6567	7.16333	5.23	1.93333	0.261824
			花期叶	25.65	18.63		6.99333	5.23	1.76333	0.294567	0.279002
			花期叶	25.72	18.7		7.06333	5.23	1.83333	0.280616
			flower	23.5	18.24	18.3067	5.19333	5.23	-0.0366667	1.02574
			花期花	23.34	18.24		5.03333	5.23	-0.196667	1.14605	1.11128
			花期花	23.32	18.44		5.01333	5.23	-0.216667	1.16205
			green fruit	24.85	17.26	17.2267	7.62333	5.23	2.39333	0.190342
			绿果	24.91	17.1		7.68333	5.23	2.45333	0.182588	0.182694
			绿果	24.97	17.32		7.74333	5.23	2.51333	0.17515
			red fruit	29.16	18.23	18.1167	11.0433	5.23	5.81333	0.0177833
			红果	28.28	18.04		10.1633	5.23	4.93333	0.0327279	0.0227239
			红果	29.17	18.08		11.0533	5.23	5.82333	0.0176605

## Sheet: stress expression
supplementary file 5. qRT-PCR data
	SHMT1	Treatments	Ct(Gene)	Ct(Actin)	△Ct	△Ct reference value	△△Ct	Relative expression	Average expression		SHMT2	Treatments	Ct(Gene)	Ct(Actin)	△Ct	△Ct reference value	△△Ct	Relative expression	Average expression
		CK-0h	22.94	17.34	5.6	5.6	0	1	1			CK-0h	17.51	17.34	0.17	0.17	0	1	1
			23.2	17.46	5.74	5.74	0	1					17.37	17.46	-0.09	-0.09	0	1
			23.21	17.56	5.65	5.65	0	1					16.93	17.56	-0.63	-0.63	0	1
		UV-6h	25.42	19.14	6.28	5.6	0.68	0.624165	0.736606			UV-6h	26.12	19.14	6.98	0.17	6.81	0.00891222	0.00668834
			25.46	19.4	6.06	5.74	0.32	0.80107					26.5	19.4	7.1	-0.09	7.19	0.00684848
			25.48	19.48	6	5.65	0.35	0.784584					26.71	19.48	7.23	-0.63	7.86	0.00430432
		UV-12h	23.26	19.15	4.11	5.6	-1.49	2.80889	2.62914			UV-12h	26.17	19.15	7.02	0.17	6.85	0.00866851	0.00634345
			23.42	19.18	4.24	5.74	-1.5	2.82843					26.21	19.18	7.03	-0.09	7.12	0.00718897
			23.38	18.9	4.48	5.65	-1.17	2.25012					26.57	18.9	7.67	-0.63	8.3	0.00317286
		UV-24h	23.02	19.21	3.81	5.6	-1.79	3.45815	3.64678			UV-24h	24.57	19.21	5.36	0.17	5.19	0.0273939	0.0216653
			22.57	18.63	3.94	5.74	-1.8	3.4822					24.35	18.63	5.72	-0.09	5.81	0.0178244
			22.35	18.7	3.65	5.65	-2	4					23.73	18.7	5.03	-0.63	5.66	0.0197774
		Cold-6h	21.96	16.63	5.33	5.6	-0.27	1.20581	1.62616			冷-6h	17.61	16.63	0.98	0.17	0.81	0.570382	0.573876
			21.61	16.92	4.69	5.74	-1.05	2.07053					17.3	16.92	0.38	-0.09	0.47	0.721965
			21.73	16.76	4.97	5.65	-0.68	1.60214					17.35	16.76	0.59	-0.63	1.22	0.429283
		Cold-12h	22.73	18.08	4.65	5.6	-0.95	1.93187	2.2437			冷-12h	18.39	18.08	0.31	0.17	0.14	0.907519	0.819454
			22.69	18.3	4.39	5.74	-1.35	2.54912					18.3	18.3	0	-0.09	0.09	0.939523
			22.76	18.28	4.48	5.65	-1.17	2.25012					18.36	18.28	0.08	-0.63	0.71	0.61132
		Cold-24h	22.95	18.8	4.15	5.6	-1.45	2.73208	2.66876			冷-24h	19.74	18.8	0.94	0.17	0.77	0.586417	0.454401
			22.51	18.43	4.08	5.74	-1.66	3.16017					19.32	18.43	0.89	-0.09	0.98	0.50698
			22.97	18.4	4.57	5.65	-1.08	2.11404					19.66	18.4	1.26	-0.63	1.89	0.269807
		Heat-6h	24.12	18.5	5.62	5.6	0.02	0.986233	1.20626			热-6h	20.07	18.5	1.57	0.17	1.4	0.378929	0.373708
			24.1	18.69	5.41	5.74	-0.33	1.25701					19.81	18.69	1.12	-0.09	1.21	0.432269
			23.75	18.56	5.19	5.65	-0.46	1.37554					19.62	18.56	1.06	-0.63	1.69	0.309927
		Heat-12h	22.21	16.88	5.33	5.6	-0.27	1.20581	1.10782			热-12h	19.7	16.88	2.82	0.17	2.65	0.15932	0.117627
			22.37	16.47	5.9	5.74	0.16	0.895025					19.7	16.47	3.23	-0.09	3.32	0.100134
			22.18	16.82	5.36	5.65	-0.29	1.22264					19.61	16.82	2.79	-0.63	3.42	0.0934281
		Heat-24h	22.97	17.29	5.68	5.6	0.08	0.946058	0.934817			热-24h	19.74	17.29	2.45	0.17	2.28	0.205898	0.141517
			22.86	17.23	5.63	5.74	-0.11	1.07923					20.13	17.23	2.9	-0.09	2.99	0.125869
			23.27	17.26	6.01	5.65	0.36	0.779165					20.06	17.26	2.8	-0.63	3.43	0.0927827
		NaCl-6h	23.04	17.83	5.21	5.6	-0.39	1.31039	1.79268			NaCl-6h	17.57	17.83	-0.26	0.17	-0.43	1.34723	0.951539
			22.43	17.82	4.61	5.74	-1.13	2.18859					17.83	17.82	0.01	-0.09	0.1	0.933033
			22.59	17.85	4.74	5.65	-0.91	1.87905					18.02	17.85	0.17	-0.63	0.8	0.574349
		NaCl-12h	22.57	18.61	3.96	5.6	-1.64	3.11666	3.15706			NaCl-12h	21.64	18.61	3.03	0.17	2.86	0.137738	0.140288
			22.63	18.4	4.23	5.74	-1.51	2.8481					20.94	18.4	2.54	-0.09	2.63	0.161544
			22.39	18.55	3.84	5.65	-1.81	3.50642					20.96	18.55	2.41	-0.63	3.04	0.121582
		NaCl-24h	23.13	18.07	5.06	5.6	-0.54	1.45397	1.7175			NaCl-24h	21.02	18.07	2.95	0.17	2.78	0.145592	0.175034
			23.51	18.58	4.93	5.74	-0.81	1.75321					20.78	18.58	2.2	-0.09	2.29	0.204476
			22.78	18.09	4.69	5.65	-0.96	1.94531					20.57	18.09	2.48	-0.63	3.11
		H2O2-6h	22.88	19.27	3.61	5.6	-1.99	3.97237	4.66029			H2O2-6h	21.2	19.27	1.93	0.17	1.76	0.295248	0.243002
			22.58	19.53	3.05	5.74	-2.69	6.45313					21.23	19.53	1.7	-0.09	1.79	0.289172
			22.93	19.11	3.82	5.65	-1.83	3.55537					21.27	19.11	2.16	-0.63	2.79	0.144586
		H2O2-12h	22.28	18.75	3.53	5.6	-2.07	4.19887	4.82138			H2O2-12h	23.59	18.75	4.84	0.17	4.67	0.0392817	0.03439
			22.6	18.84	3.76	5.74	-1.98	3.94493					23.79	18.84	4.95	-0.09	5.04	0.0303955
			22.38	19.39	2.99	5.65	-2.66	6.32033					23.66	19.39	4.27	-0.63	4.9	0.0334929
		H2O2-24h	23.86	19.09	4.77	5.6	-0.83	1.77769	2.11391			H2O2-24h	22.21	19.09	3.12	0.17	2.95	0.129408	0.103252
			23.01	18.43	4.58	5.74	-1.16	2.23457					21.98	18.43	3.55	-0.09	3.64	0.0802141
			23.45	19.02	4.43	5.65	-1.22	2.32947					21.71	19.02	2.69	-0.63	3.32	0.100134
		ABA-6h	22.79	18.11	4.68	5.6	-0.92	1.89212	1.74354			ABA-6h	18.98	18.11	0.87	0.17	0.7	0.615572	0.44659
			22.33	17.57	4.76	5.74	-0.98	1.97247					18.63	17.57	1.06	-0.09	1.15	0.450625
			22.95	17.75	5.2	5.65	-0.45	1.36604					18.99	17.75	1.24	-0.63	1.87	0.273573
		ABA-12h	23.2	18.52	4.68	5.6	-0.92	1.89212	1.77649			ABA-12h	19.38	18.52	0.86	0.17	0.69	0.619854	0.46982
			23.61	18.29	5.32	5.74	-0.42	1.33793					19.3	18.29	1.01	-0.09	1.1	0.466516
			22.93	18.35	4.58	5.65	-1.07	2.09943					19.35	18.35	1	-0.63	1.63	0.323088
		ABA-24h	21.81	17.54	4.27	5.6	-1.33	2.51403	2.98904			ABA-24h	19.97	17.54	2.43	0.17	2.26	0.208772	0.219009
			21.93	18.04	3.89	5.74	-1.85	3.605					19.66	18.04	1.62	-0.09	1.71	0.30566
			21.72	17.58	4.14	5.65	-1.51	2.8481					19.76	17.58	2.18	-0.63	2.81	0.142595
		PEG-6h	22.4	17.4	5	5.6	-0.6	1.51572	1.64307			PEG-6h	18.43	17.4	1.03	0.17	0.86	0.550953	0.503954
			22.78	17.75	5.03	5.74	-0.71	1.6358					18.51	17.75	0.76	-0.09	0.85	0.554785
			22.74	17.92	4.82	5.65	-0.83	1.77769					18.59	17.92	0.67	-0.63	1.3	0.406126
		PEG-12h	22.04	17.38	4.66	5.6	-0.94	1.91853	2.05898			PEG-12h	18.35	17.38	0.97	0.17	0.8	0.574349	0.434194
			22	17.32	4.68	5.74	-1.06	2.08493					18.48	17.32	1.16	-0.09	1.25	0.420448
			21.87	17.34	4.53	5.65	-1.12	2.17347					18.41	17.34	1.07	-0.63	1.7	0.307786
		PEG-24h	22.48	18.35	4.13	5.6	-1.47	2.77022	2.57671			PEG-24h	19.07	18.35	0.72	0.17	0.55	0.68302	0.486816
			22.84	18.44	4.4	5.74	-1.34	2.53151					19.58	18.44	1.14	-0.09	1.23	0.426317
			22.71	18.34	4.37	5.65	-1.28	2.42839					19.22	18.34	0.88	-0.63	1.51	0.351111
	SHMT3	Treatments	Ct(Gene)	Ct(Actin)	△Ct	△Ct reference value	△△Ct	Relative expression	Average expression		SHMT4	Treatments	Ct(Gene)	Ct(Actin)	△Ct	△Ct reference value	△△Ct	Relative expression	Average expression
		CK-0h	22.2	17.34	4.86	4.86	0	1	1			CK-0h	19.47	17.34	2.13	2.13	0	1	1
			22.27	17.46	4.81	4.81	0	1					19.62	17.46	2.16	2.16	0	1
			21.74	17.56	4.18	4.18	0	1					18.69	17.56	1.13	1.13	0	1
		UV-6h	25.3	19.14	6.16	4.86	1.3	0.406126	0.38791			UV-6h	22.99	19.14	3.85	2.13	1.72	0.303549	0.26241
			25.42	19.4	6.02	4.81	1.21	0.432269					23.22	19.4	3.82	2.16	1.66	0.316439
			25.28	19.48	5.8	4.18	1.62	0.325335					23.19	19.48	3.71	1.13	2.58	0.167241
		UV-12h	25.62	19.15	6.47	4.86	1.61	0.327598	0.293166			UV-12h	22.64	19.15	3.49	2.13	1.36	0.389582	0.297149
			25.67	19.18	6.49	4.81	1.68	0.312083					22.79	19.18	3.61	2.16	1.45	0.366021
			25.14	18.9	6.24	4.18	2.06	0.239816					22.91	18.9	4.01	1.13	2.88	0.135842
		UV-24h	23.3	19.21	4.09	4.86	-0.77	1.70527	1.04676			UV-24h	22.03	19.21	2.82	2.13	0.69	0.619854	0.433214
			23.67	18.63	5.04	4.81	0.23	0.852635					21.98	18.63	3.35	2.16	1.19	0.438303
			23.66	18.7	4.96	4.18	0.78	0.582367					21.88	18.7	3.18	1.13	2.05	0.241484
		Cold-6h	21.16	16.63	4.53	4.86	-0.33	1.25701	0.98118			Cold-6h	18.74	16.63	2.11	2.13	-0.02	1.01396	0.944424
			21.76	16.92	4.84	4.81	0.03	0.97942					18.72	16.92	1.8	2.16	-0.36	1.28343
			21.44	16.76	4.68	4.18	0.5	0.707107					18.79	16.76	2.03	1.13	0.9	0.535887
		Cold-12h	22.78	18.08	4.7	4.86	-0.16	1.11729	1.14099			Cold-12h	19.62	18.08	1.54	2.13	-0.59	1.50525	1.46467
			22.62	18.3	4.32	4.81	-0.49	1.40444					19.43	18.3	1.13	2.16	-1.03	2.04202
			22.61	18.28	4.33	4.18	0.15	0.90125					19.65	18.28	1.37	1.13	0.24	0.846745
		Cold-24h	22.25	18.8	3.45	4.86	-1.41	2.65737	1.66484			Cold-24h	19.96	18.8	1.16	2.13	-0.97	1.95884	1.47689
			22.67	18.43	4.24	4.81	-0.57	1.48452					19.84	18.43	1.41	2.16	-0.75	1.68179
			22.81	18.4	4.41	4.18	0.23	0.852635					19.87	18.4	1.47	1.13	0.34	0.790041
		Heat-6h	24.4	18.5	5.9	4.86	1.04	0.486327	0.459409			Heat-6h	22.55	18.5	4.05	2.13	1.92	0.264255	0.223739
			24.4	18.69	5.71	4.81	0.9	0.535887					22.89	18.69	4.2	2.16	2.04	0.243164
			24.23	18.56	5.67	4.18	1.49	0.356013					22.3	18.56	3.74	1.13	2.61	0.163799
		Heat-12h	23.49	16.88	6.61	4.86	1.75	0.297302	0.243521			Heat-12h	22.09	16.88	5.21	2.13	3.08	0.118257	0.0927011
			23.34	16.47	6.87	4.81	2.06	0.239816					21.93	16.47	5.46	2.16	3.3	0.101532
			23.37	16.82	6.55	4.18	2.37	0.193446					22.05	16.82	5.23	1.13	4.1	0.0583146
		Heat-24h	24.78	17.29	7.49	4.86	2.63	0.161544	0.130639			Heat-24h	22.71	17.29	5.42	2.13	3.29	0.102238	0.0867614
			24.85	17.23	7.62	4.81	2.81	0.142595					22.65	17.23	5.42	2.16	3.26	0.104386
			24.95	17.26	7.69	4.18	3.51	0.0877778					22.61	17.26	5.35	1.13	4.22	0.0536603
		NaCl-6h	22.16	17.83	4.33	4.86	-0.53	1.44393	1.15722			NaCl-6h	19.63	17.83	1.8	2.13	-0.33	1.25701	1.04483
			22.39	17.82	4.57	4.81	-0.24	1.18099					19.63	17.82	1.81	2.16	-0.35	1.27456
			22.27	17.85	4.42	4.18	0.24	0.846745					19.71	17.85	1.86	1.13	0.73	0.602904
		NaCl-12h	23.27	18.61	4.66	4.86	-0.2	1.1487	0.92124			NaCl-12h	21.07	18.61	2.46	2.13	0.33	0.795536	0.776044
			23.29	18.4	4.89	4.81	0.08	0.946058					20.43	18.4	2.03	2.16	-0.13	1.09429
			23.31	18.55	4.76	4.18	0.58	0.668964					20.87	18.55	2.32	1.13	1.19	0.438303
		NaCl-24h	23.73	18.07	5.66	4.86	0.8	0.574349	0.607335			NaCl-24h	21.01	18.07	2.94	2.13	0.81	0.570382	0.601585
			23.62	18.58	5.04	4.81	0.23	0.852635					20.85	18.58	2.27	2.16	0.11	0.926588
			23.61	18.09	5.52	4.18	1.34	0.395021					20.92	18.09	2.83	1.13	1.7	0.307786
		H2O2-6h	23.97	19.27	4.7	4.86	-0.16	1.11729	1.02045			H2O2-6h	21.34	19.27	2.07	2.13	-0.06	1.04247	1.10105
			23.85	19.53	4.32	4.81	-0.49	1.40444					20.95	19.53	1.42	2.16	-0.74	1.67018
			24.18	19.11	5.07	4.18	0.89	0.539614					21	19.11	1.89	1.13	0.76	0.590496
		H2O2-12h	25.26	18.75	6.51	4.86	1.65	0.31864	0.383821			H2O2-12h	22.36	18.75	3.61	2.13	1.48	0.358489	0.336961
			24.54	18.84	5.7	4.81	0.89	0.539614					22.43	18.84	3.59	2.16	1.43	0.371131
			25.34	19.39	5.95	4.18	1.77	0.293209					22.35	19.39	2.96	1.13	1.83	0.281265
		H2O2-24h	23.36	19.09	4.27	4.86	-0.59	1.50525	1.66847			H2O2-24h	18.98	19.09	-0.11	2.13	-2.24	4.72397	3.28292
			22.2	18.43	3.77	4.81	-1.04	2.05623					18.88	18.43	0.45	2.16	-1.71	3.27161
			22.67	19.02	3.65	4.18	-0.53	1.44393					19.26	19.02	0.24	1.13	-0.89	1.85318
		ABA-6h	22.52	18.11	4.41	4.86	-0.45	1.36604	1.05511			ABA-6h	19.18	18.11	1.07	2.13	-1.06	2.08493	1.33135
			22.24	17.57	4.67	4.81	-0.14	1.10191					19.34	17.57	1.77	2.16	-0.39	1.31039
			22.45	17.75	4.7	4.18	0.52	0.697372					19.62	17.75	1.87	1.13	0.74	0.598739
		ABA-12h	23.41	18.52	4.89	4.86	0.03	0.97942	0.761323			ABA-12h	20.98	18.52	2.46	2.13	0.33	0.795536	0.601212
			23.42	18.29	5.13	4.81	0.32	0.80107					21.02	18.29	2.73	2.16	0.57	0.673617
			23.52	18.35	5.17	4.18	0.99	0.503478					21.06	18.35	2.71	1.13	1.58	0.334482
		ABA-24h	22.02	17.54	4.48	4.86	-0.38	1.30134	1.4092			ABA-24h	19.94	17.54	2.4	2.13	0.27	0.82932	0.762525
			21.7	18.04	3.66	4.81	-1.15	2.21914					20.05	18.04	2.01	2.16	-0.15	1.10957
			22.26	17.58	4.68	4.18	0.5	0.707107					20.23	17.58	2.65	1.13	1.52	0.348686
		PEG-6h	22.38	17.4	4.98	4.86	0.12	0.920188	0.857245			PEG-6h	20.07	17.4	2.67	2.13	0.54	0.687771	0.665654
			22.65	17.75	4.9	4.81	0.09	0.939523					20.13	17.75	2.38	2.16	0.22	0.858565
			22.59	17.92	4.67	4.18	0.49	0.712025					20.2	17.92	2.28	1.13	1.15	0.450625
		PEG-12h	21.85	17.38	4.47	4.86	-0.39	1.31039	1.11053			PEG-12h	19.93	17.38	2.55	2.13	0.42	0.747425	0.646929
			21.83	17.32	4.51	4.81	-0.3	1.23114					19.82	17.32	2.5	2.16	0.34	0.790041
			21.86	17.34	4.52	4.18	0.34	0.790041					19.78	17.34	2.44	1.13	1.31	0.403321
		PEG-24h	22.79	18.35	4.44	4.86	-0.42	1.33793	1.064			PEG-24h	20.3	18.35	1.95	2.13	-0.18	1.13288	0.89171
			23.04	18.44	4.6	4.81	-0.21	1.15669					20.57	18.44	2.13	2.16	-0.03	1.02101
			23.04	18.34	4.7	4.18	0.52	0.697372					20.41	18.34	2.07	1.13	0.94	0.521233
	SHMT5	Treatments	Ct(Gene)	Ct(Actin)	△Ct	△Ct reference value	△△Ct	Relative expression	Average expression		SHMT6	Treatments	Ct(Gene)	Ct(Actin)	△Ct	△Ct reference value	△△Ct	Relative expression	Average expression
		CK-0h	22.89	17.34	5.55	5.55	0	1	1			CK-0h	22.13	17.34	4.79	4.79	0	1	1
			23.29	17.46	5.83	5.83	0	1					22.07	17.46	4.61	4.61	0	1
			22.84	17.56	5.28	5.28	0	1					21.66	17.56	4.1	4.1	0	1
		UV-6h	24.6	19.14	5.46	5.55	-0.09	1.06437	1.13503			UV-6h	24.91	19.14	5.77	4.79	0.98	0.50698	0.457667
			24.93	19.4	5.53	5.83	-0.3	1.23114					25.01	19.4	5.61	4.61	1	0.5
			24.61	19.48	5.13	5.28	-0.15	1.10957					25.03	19.48	5.55	4.1	1.45	0.366021
		UV-12h	24.14	19.15	4.99	5.55	-0.56	1.47427	1.46695			UV-12h	24.34	19.15	5.19	4.79	0.4	0.757858	0.603928
			24.01	19.18	4.83	5.83	-1	2					24.38	19.18	5.2	4.61	0.59	0.664343
			24.29	18.9	5.39	5.28	0.11	0.926588					24.36	18.9	5.46	4.1	1.36	0.389582
		UV-24h	22.88	19.21	3.67	5.55	-1.88	3.68075	3.03258			UV-24h	23.88	19.21	4.67	4.79	-0.12	1.08673	0.829327
			22.67	18.63	4.04	5.83	-1.79	3.45815					23.99	18.63	5.36	4.61	0.75	0.594604
			23.01	18.7	4.31	5.28	-0.97	1.95884					23.11	18.7	4.41	4.1	0.31	0.806642
		Cold-6h	21.86	16.63	5.23	5.55	-0.32	1.24833	1.21831			Cold-6h	21.73	16.63	5.1	4.79	0.31	0.806642	0.657792
			22.21	16.92	5.29	5.83	-0.54	1.45397					22.1	16.92	5.18	4.61	0.57	0.673617
			22.11	16.76	5.35	5.28	0.07	0.952638					21.88	16.76	5.12	4.1	1.02	0.493116
		Cold-12h	23.38	18.08	5.3	5.55	-0.25	1.18921	1.2857			Cold-12h	23.69	18.08	5.61	4.79	0.82	0.566442	0.581149
			23.49	18.3	5.19	5.83	-0.64	1.55833					23.43	18.3	5.13	4.61	0.52	0.697372
			23.41	18.28	5.13	5.28	-0.15	1.10957					23.44	18.28	5.16	4.1	1.06	0.479632
		Cold-24h	24.08	18.8	5.28	5.55	-0.27	1.20581	1.1758			Cold-24h	23.96	18.8	5.16	4.79	0.37	0.773782	0.57362
			23.8	18.43	5.37	5.83	-0.46	1.37554					23.89	18.43	5.46	4.61	0.85	0.554785
			23.76	18.4	5.36	5.28	0.08	0.946058					23.85	18.4	5.45	4.1	1.35	0.392292
		Heat-6h	24.34	18.5	5.84	5.55	0.29	0.817902	0.872129			Heat-6h	24.45	18.5	5.95	4.79	1.16	0.447513	0.39749
			24.54	18.69	5.85	5.83	0.02	0.986233					24.53	18.69	5.84	4.61	1.23	0.426317
			24.14	18.56	5.58	5.28	0.3	0.812252					24.31	18.56	5.75	4.1	1.65	0.31864
		Heat-12h	22.67	16.88	5.79	5.55	0.24	0.846745	0.797014			Heat-12h	22.75	16.88	5.87	4.79	1.08	0.473029	0.374572
			22.75	16.47	6.28	5.83	0.45	0.732043					22.71	16.47	6.24	4.61	1.63	0.323088
			22.4	16.82	5.58	5.28	0.3	0.812252					22.53	16.82	5.71	4.1	1.61	0.327598
		Heat-24h	23.66	17.29	6.37	5.55	0.82	0.566442	0.667314			Heat-24h	23.49	17.29	6.2	4.79	1.41	0.376312	0.30405
			23.31	17.23	6.08	5.83	0.25	0.840896					23.52	17.23	6.29	4.61	1.68	0.312083
			23.29	17.26	6.03	5.28	0.75	0.594604					23.52	17.26	6.26	4.1	2.16	0.223756
		NaCl-6h	22.27	17.83	4.44	5.55	-1.11	2.15846	2.0784			NaCl-6h	22.79	17.83	4.96	4.79	0.17	0.888843	0.727027
			22.33	17.82	4.51	5.83	-1.32	2.49666					22.84	17.82	5.02	4.61	0.41	0.752623
			22.47	17.85	4.62	5.28	-0.66	1.58008					22.84	17.85	4.99	4.1	0.89	0.539614
		NaCl-12h	22.78	18.61	4.17	5.55	-1.38	2.60268	2.71729			NaCl-12h	23.65	18.61	5.04	4.79	0.25	0.840896	0.496185
			22.62	18.4	4.22	5.83	-1.61	3.05252					24.4	18.4	6	4.61	1.39	0.381565
			22.51	18.55	3.96	5.28	-1.32	2.49666					24.56	18.55	6.01	4.1	1.91	0.266093
		NaCl-24h	23.56	18.07	5.49	5.55	-0.06	1.04247	1.58405			NaCl-24h	23.66	18.07	5.59	4.79	0.8	0.574349	0.610448
			23.23	18.58	4.65	5.83	-1.18	2.26577					23.31	18.58	4.73	4.61	0.12	0.920188
			22.84	18.09	4.75	5.28	-0.53	1.44393					23.76	18.09	5.67	4.1	1.57	0.336808
		H2O2-6h	23.08	19.27	3.81	5.55	-1.74	3.34035	2.90359			H2O2-6h	23.03	19.27	3.76	4.79	-1.03	2.04202	1.98362
			23.53	19.53	4	5.83	-1.83	3.55537					22.52	19.53	2.99	4.61	-1.62	3.07375
			23.53	19.11	4.42	5.28	-0.86	1.81504					23.47	19.11	4.36	4.1	0.26	0.835088
		H2O2-12h	24.36	18.75	5.61	5.55	0.06	0.959264	1.04972			H2O2-12h	24.06	18.75	5.31	4.79	0.52	0.697372	0.795095
			24.59	18.84	5.75	5.83	-0.08	1.05702					23.3	18.84	4.46	4.61	-0.15	1.10957
			24.49	19.39	5.1	5.28	-0.18	1.13288					24.28	19.39	4.89	4.1	0.79	0.578344
		H2O2-24h	22.32	19.09	3.23	5.55	-2.32	4.99332	3.45463			H2O2-24h	22.32	19.09	3.23	4.79	-1.56	2.94854	2.34911
			22.85	18.43	4.42	5.83	-1.41	2.65737					22.36	18.43	3.93	4.61	-0.68	1.60214
			22.86	19.02	3.84	5.28	-1.44	2.71321					21.8	19.02	2.78	4.1	-1.32	2.49666
		ABA-6h	22.02	18.11	3.91	5.55	-1.64	3.11666	2.05678			ABA-6h	22.35	18.11	4.24	4.79	-0.55	1.46409	0.864859
			22.75	17.57	5.18	5.83	-0.65	1.56917					22.93	17.57	5.36	4.61	0.75	0.594604
			22.46	17.75	4.71	5.28	-0.57	1.48452					22.75	17.75	5	4.1	0.9	0.535887
		ABA-12h	22.57	18.52	4.05	5.55	-1.5	2.82843	3.07703			ABA-12h	22.51	18.52	3.99	4.79	-0.8	1.7411	1.31497
			22.05	18.29	3.76	5.83	-2.07	4.19887					22.6	18.29	4.31	4.61	-0.3	1.23114
			22.49	18.35	4.14	5.28	-1.14	2.20381					22.49	18.35	4.14	4.1	0.04	0.972655
		ABA-24h	21.53	17.54	3.99	5.55	-1.56	2.94854	3.75757			ABA-24h	22.01	17.54	4.47	4.79	-0.32	1.24833	1.50606
			21.26	18.04	3.22	5.83	-2.61	6.10504					21.49	18.04	3.45	4.61	-1.16	2.23457
			21.71	17.58	4.13	5.28	-1.15	2.21914					21.63	17.58	4.05	4.1	-0.05	1.03526
		PEG-6h	22.1	17.4	4.7	5.55	-0.85	1.8025	2.03968			PEG-6h	22.66	17.4	5.26	4.79	0.47	0.721965	0.682003
			22.25	17.75	4.5	5.83	-1.33	2.51403					22.69	17.75	4.94	4.61	0.33	0.795536
			22.35	17.92	4.43	5.28	-0.85	1.8025					22.94	17.92	5.02	4.1	0.92	0.528509
		PEG-12h	21.59	17.38	4.21	5.55	-1.34	2.53151	2.92847			PEG-12h	21.76	17.38	4.38	4.79	-0.41	1.32869	0.965047
			21.16	17.32	3.84	5.83	-1.99	3.97237					22.2	17.32	4.88	4.61	0.27	0.82932
			21.43	17.34	4.09	5.28	-1.19	2.28153					21.88	17.34	4.54	4.1	0.44	0.737135
		PEG-24h	22.25	18.35	3.9	5.55	-1.65	3.13834	2.87075			PEG-24h	23.36	18.35	5.01	4.79	0.22	0.858565	1.23575
			22.44	18.44	4	5.83	-1.83	3.55537					22.18	18.44	3.74	4.61	-0.87	1.82766
			22.68	18.34	4.34	5.28	-0.94	1.91853					22.41	18.34	4.07	4.1	-0.03	1.02101
	SHMT7	Treatments	Ct(Gene)	Ct(Actin)	△Ct	△Ct reference value	△△Ct	Relative expression	Average expression
		CK-0h	22.7	17.34	5.36	5.36	0	1	1
			22.65	17.46	5.19	5.19	0	1
			22.2	17.56	4.64	4.64	0	1
		UV-6h	26.83	19.14	7.69	5.36	2.33	0.198884	0.186524
			26.96	19.4	7.56	5.19	2.37	0.193446
			26.7	19.48	7.22	4.64	2.58	0.167241
		UV-12h	27.25	19.15	8.1	5.36	2.74	0.149685	0.131127
			27.04	19.18	7.86	5.19	2.67	0.157127
			27.07	18.9	8.17	4.64	3.53	0.0865693
		UV-24h	22.73	19.21	3.52	5.36	-1.84	3.5801	2.73807
			22.12	18.63	3.49	5.19	-1.7	3.24901
			22.87	18.7	4.17	4.64	-0.47	1.38511
		Cold-6h	22.25	16.63	5.62	5.36	0.26	0.835088	0.619401
			22.82	16.92	5.9	5.19	0.71	0.61132
			22.68	16.76	5.92	4.64	1.28	0.411796
		Cold-12h	23.46	18.08	5.38	5.36	0.02	0.986233	0.834527
			23.66	18.3	5.36	5.19	0.17	0.888843
			23.59	18.28	5.31	4.64	0.67	0.628507
		Cold-24h	24.29	18.8	5.49	5.36	0.13	0.913831	0.72557
			23.92	18.43	5.49	5.19	0.3	0.812252
			24.19	18.4	5.79	4.64	1.15	0.450625
		Heat-6h	26.71	18.5	8.21	5.36	2.85	0.138696	0.126233
			26.59	18.69	7.9	5.19	2.71	0.15283
			26.72	18.56	8.16	4.64	3.52	0.0871715
		Heat-12h	25.86	16.88	8.98	5.36	3.62	0.0813339	0.0718211
			25.49	16.47	9.02	5.19	3.83	0.0703162
			25.43	16.82	8.61	4.64	3.97	0.0638133
		Heat-24h	26.94	17.29	9.65	5.36	4.29	0.0511189	0.0385435
			27.15	17.23	9.92	5.19	4.73	0.0376815
			27.12	17.26	9.86	4.64	5.22	0.0268302
		NaCl-6h	22.8	17.83	4.97	5.36	-0.39	1.31039	1.03451
			22.96	17.82	5.14	5.19	-0.05	1.03526
			22.89	17.85	5.04	4.64	0.4	0.757858
		NaCl-12h	23.66	18.61	5.05	5.36	-0.31	1.23971	1.11456
			23	18.4	4.6	5.19	-0.59	1.50525
			23.93	18.55	5.38	4.64	0.74	0.598739
		NaCl-24h	24.87	18.07	6.8	5.36	1.44	0.368567	0.383018
			24.51	18.58	5.93	5.19	0.74	0.598739
			25.19	18.09	7.1	4.64	2.46	0.181747
		H2O2-6h	23.61	19.27	4.34	5.36	-1.02	2.02792	1.97667
			23.15	19.53	3.62	5.19	-1.57	2.96905
			23.85	19.11	4.74	4.64	0.1	0.933033
		H2O2-12h	24.33	18.75	5.58	5.36	0.22	0.858565	0.597914
			24.98	18.84	6.14	5.19	0.95	0.517632
			25.29	19.39	5.9	4.64	1.26	0.417544
		H2O2-24h	23	19.09	3.91	5.36	-1.45	2.73208	2.18131
			23.39	18.43	4.96	5.19	-0.23	1.17283
			22.26	19.02	3.24	4.64	-1.4	2.63902
		ABA-6h	22.51	18.11	4.4	5.36	-0.96	1.94531	1.15547
			22.91	17.57	5.34	5.19	0.15	0.90125
			23.08	17.75	5.33	4.64	0.69	0.619854
		ABA-12h	24.26	18.52	5.74	5.36	0.38	0.768438	0.821444
			23.41	18.29	5.12	5.19	-0.07	1.04972
			23.62	18.35	5.27	4.64	0.63	0.646176
		ABA-24h	22.71	17.54	5.17	5.36	-0.19	1.14076	0.984605
			22.97	18.04	4.93	5.19	-0.26	1.19748
			22.92	17.58	5.34	4.64	0.7	0.615572
		PEG-6h	24.41	17.4	7.01	5.36	1.65	0.31864	0.434386
			23.61	17.75	5.86	5.19	0.67	0.628507
			24.05	17.92	6.13	4.64	1.49	0.356013
		PEG-12h	22.29	17.38	4.91	5.36	-0.45	1.36604	1.10613
			22.26	17.32	4.94	5.19	-0.25	1.18921
			22.37	17.34	5.03	4.64	0.39	0.76313
		PEG-24h	22.83	18.35	4.48	5.36	-0.88	1.84038	1.57076
			22.67	18.44	4.23	5.19	-0.96	1.94531
			23.09	18.34	4.75	4.64	0.11	0.926588
